# Supplementary material
Source: publisher figshare collection journal article supplement (https://acs.figshare.com/ndownloader/files/18062900)
Supplement: Supplementary file 1 [file 18062900]

# Highly Efficient and Sustained Electrochemical Hydrogen Evolution by Embedded Pd-Nanoparticles on a Coordination Polymer - Reduced Graphene Oxide Composite

Chandraraj Alex<sup>a,b</sup>, Sachin A. Bhat<sup>a,b</sup>, Neena S. John<sup>a,\*</sup> and C. V. Yelamaggad<sup>a,\*</sup>

<sup>a</sup>Centre for Nano and Soft Matter Sciences (CeNS), Jalahalli, Bengaluru 560 013, India.

<sup>b</sup>Department of Chemistry, Mangalore University, Mangalagangothri 574 199, India

\* Corresponding Authors: E-mails - [jsneena@cens.res.in](mailto:jsneena@cens.res.in); [yelamaggad@cens.res.in](mailto:yelamaggad@cens.res.in)

## Supporting information

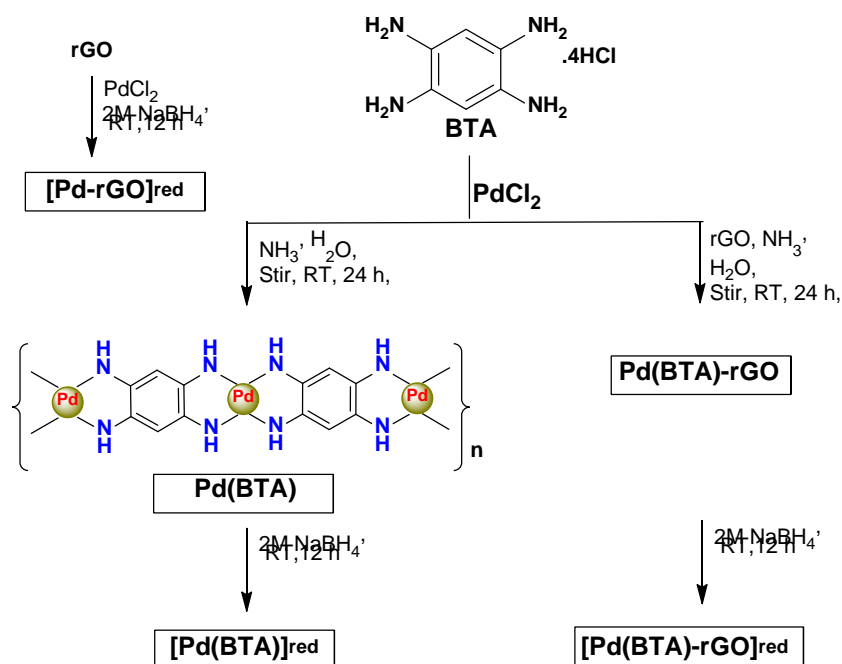

Scheme

**Figure S1.** Synthesis of materials investigated for HER

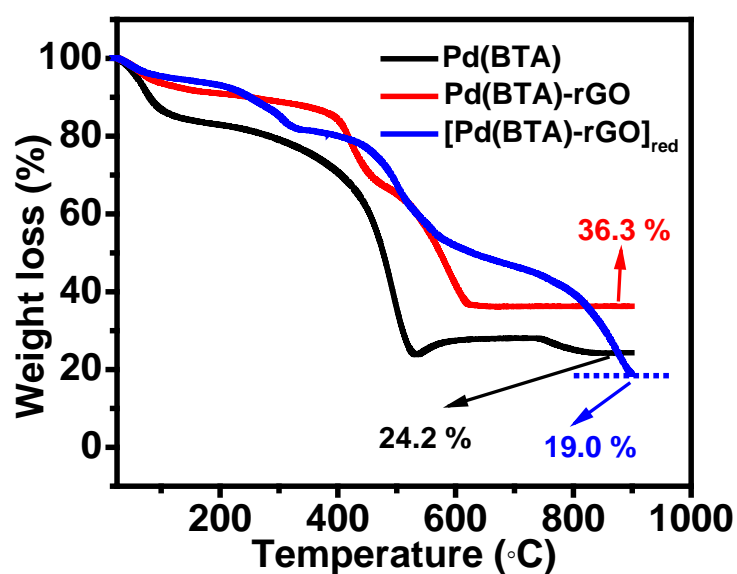

**Figure S2.** TGA curves collected in an oxygen atmosphere for the materials **Pd(BTA)** (black trace), **Pd(BTA)-rGO** (red trace) and **[Pd(BTA)-rGO]<sub>red</sub>** (blue trace).

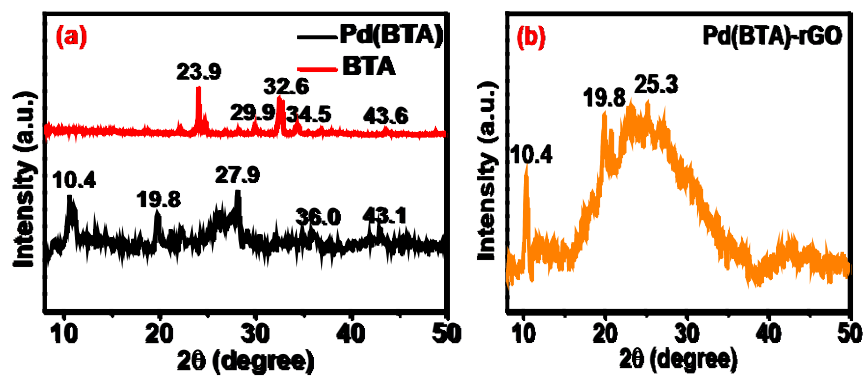

**Figure S3.** XRD of pristine (a) **BTA** and **Pd(BTA)** (b) **Pd(BTA)-rGO**

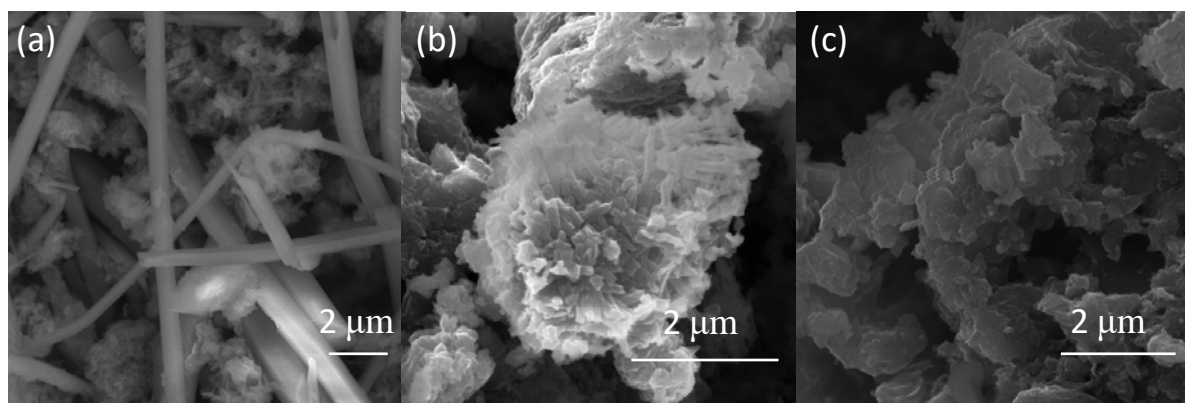

**Figure S4.** FE-SEM images of (a) **Pd(BTA)** (b) **Pd(BTA)-rGO** and (c) **[Pd(BTA)-rGO]<sub>red</sub>**

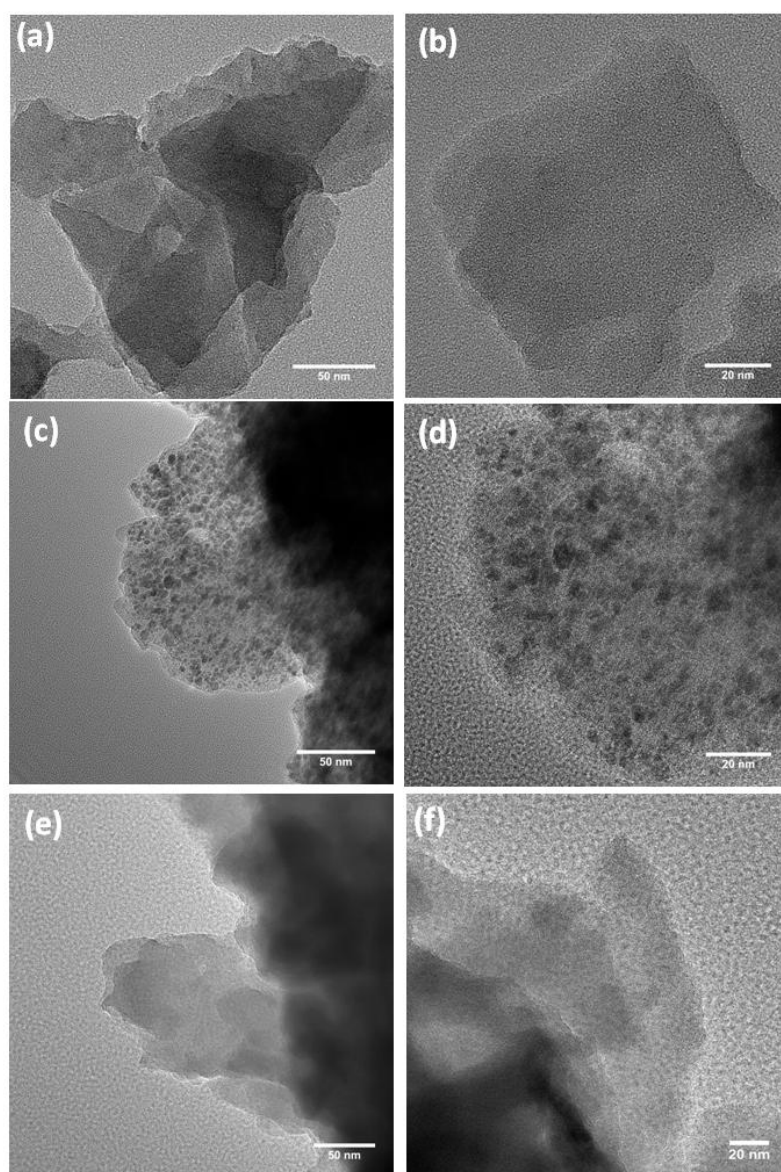

**Figure S5.** TEM images of (a,b)**Pd(BTA)** , (c,d) **[Pd(BTA)]<sub>red</sub>** and (e,f) **Pd(BTA)-rGO**.

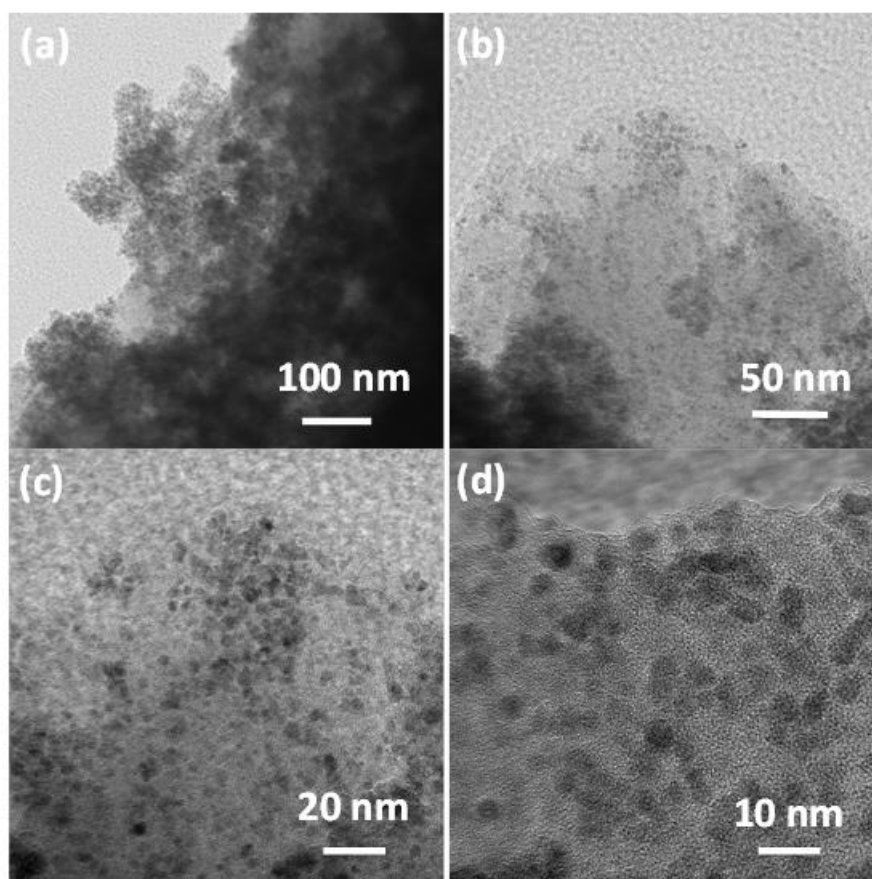

**Figure S6.** TEM images of [Pd(BTA)-rGO]<sub>red</sub> at different magnifications (a-d) lower to higher magnification

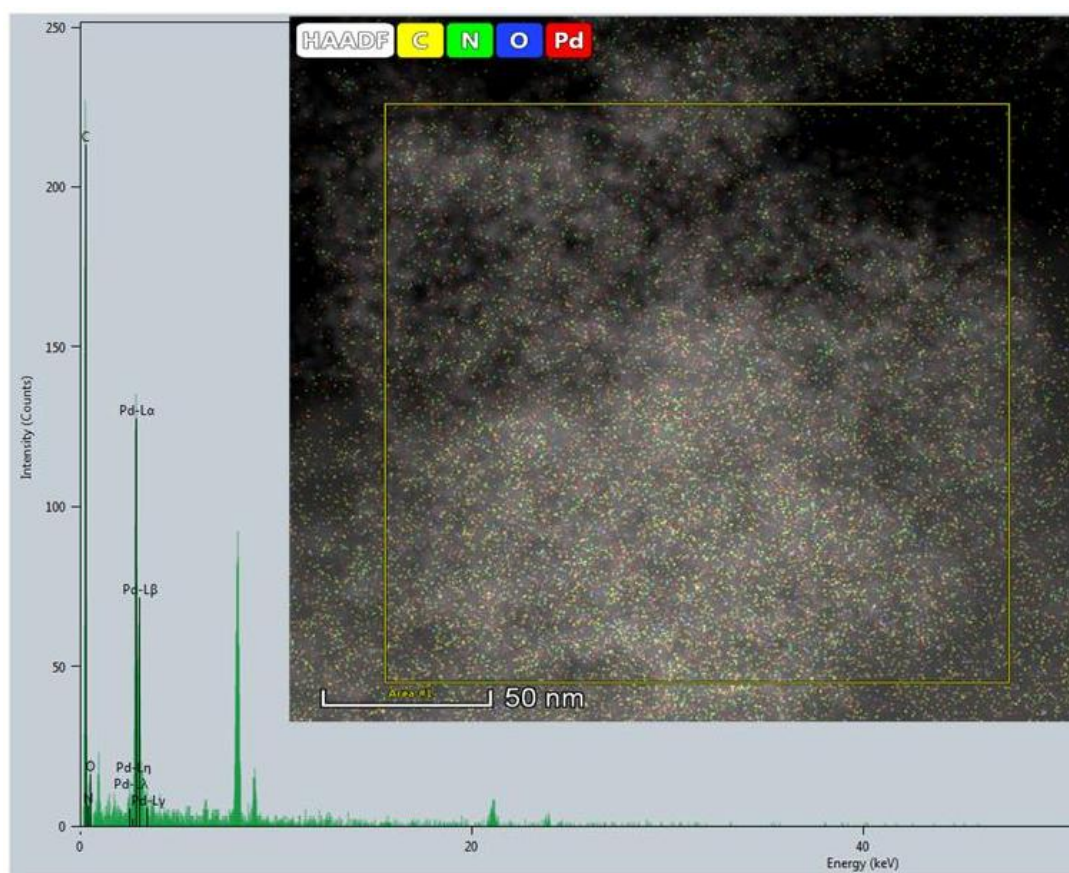

**Figure S7.** EDS spectra of  $[\text{Pd}(\text{BTA})\text{-rGO}]_{\text{red}}$ ; the inset (yellow square) shows the area scanned for EDS acquisition

**Table S1.** Atomic percentage of various elements in  $[\text{Pd}(\text{BTA})\text{-rGO}]_{\text{red}}$  sample derived from the EDS spectra

| Z  | Element | Family | Atomic Fraction (%) | Atomic Error (%) | Mass Fraction (%) | Mass Error (%) | Fit error (%) |
|----|---------|--------|---------------------|------------------|-------------------|----------------|---------------|
| 6  | C       | K      | 75.96               | 5.15             | 46.71             | 2.79           | 2.36          |
| 7  | N       | K      | 10.17               | 2.14             | 7.14              | 1.49           | 2.07          |
| 8  | O       | K      | 5                   | 1.31             | 4.17              | 1.09           | 15.81         |
| 46 | Pd      | K      | 8.86                | 1.21             | 41.97             | 5.58           | 0.91          |

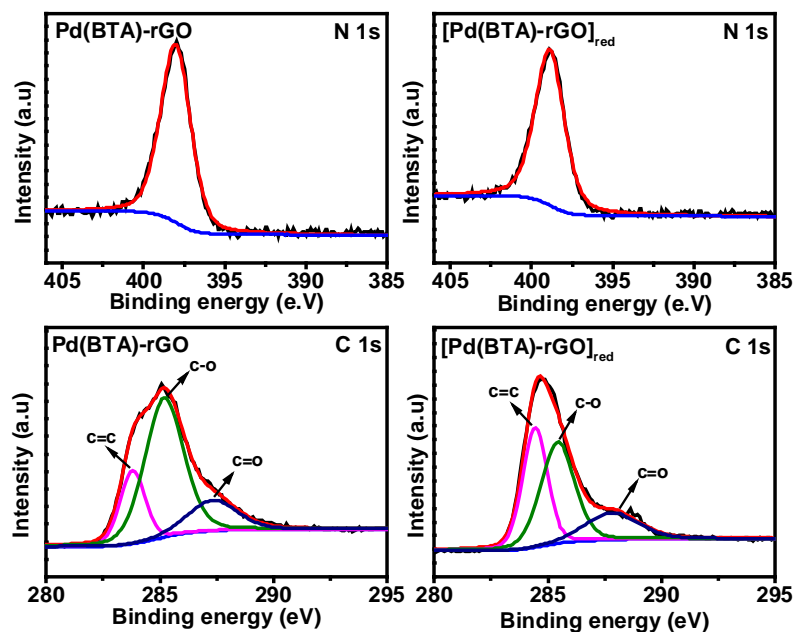

**Figure S8.** XPS profiles of the samples **Pd(BTA)-rGO** and **[Pd(BTA)-rGO]<sub>red</sub>**; N 1s (top) and C 1s (bottom).

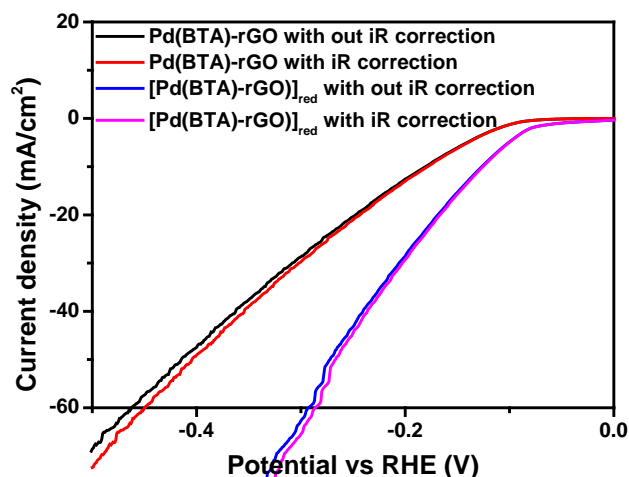

**Figure S9.** LSV of **Pd(BTA)-rGO** and **[Pd(BTA)-rGO]<sub>red</sub>** with and without iR compensation.

### S10: TOF Calculation

Number of active sites ( $n$ ) has calculated by using the formula,

$$n = \text{Area under the CV curve} / 2F$$

Area under the curve of **Pd(BTA)-rGO** and **[Pd(BTA)-rGO]<sub>red</sub>** is calculated by integration of CV given in Figure S14a

$$A_{\text{Pd(BTA)-rGO}} = 1.99218 \times 10^{-4}$$

$$A_{\text{[Pd(BTA)-rGO]red}} = 4.17881 \times 10^{-4}$$

$$n_{\text{Pd(BTA)-rGO}} = 1.03222 \times 10^{-9}$$

$$n_{[Pd(BTA)-rGO]_{red}} = 2.16519 \times 10^{-9}$$

TOF calculated by using the formula,

$$TOF = I / 2nF$$

I = current observed from linear sweep voltammetry at -0.2 V vs RHE (A)

n = number of active sites (moles)

F = Faraday constant (coulombs /mole).

The value ½ has included because two electrons are required to generate one H<sub>2</sub> molecule (2H<sup>+</sup> + 2e = H<sub>2</sub>).

TOF of Pd(BTA)-rGO = 65.8 s<sup>-1</sup> @ -0.2 V vs RHE.

TOF of [Pd(BTA)-rGO]<sub>red</sub> = 68.7 s<sup>-1</sup> @ -0.2 V vs RHE.

### S11. Faradaic efficiency Calculation

The Faradaic efficiency calculation of catalyst [Pd(BTA)rGO]<sub>red</sub> has carried out by constant potential chronoamperometric study. The constant potential of -0.78 V vs RHE was maintained for 1 hour and the gas was collected by inverse burette method. The Pd(BTA)-rGO]<sub>red</sub> produces 82 mL of gas in the 1 hour time period and we are able to get around 88.1 % Faradaic efficiency.

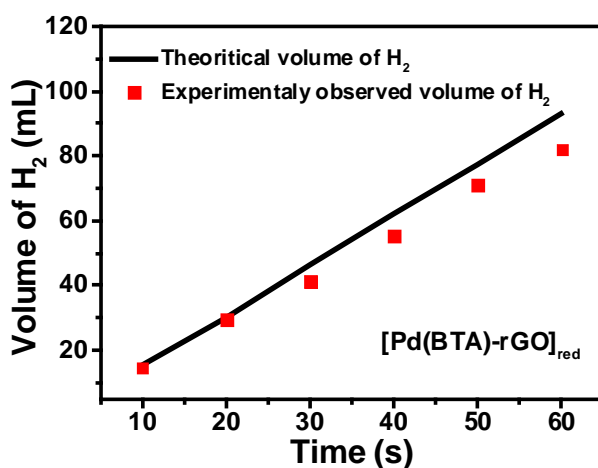

**Figure S11.** The plot represent amount of H<sub>2</sub> collection with time during HER for [Pd(BTA)-rGO]<sub>red</sub>

The amount of gas evolved during the HER reaction calculated by using faraday first law of electrolysis with the following equation.

$$\text{Mole of H}_2 = \frac{1}{2} \int_0^t I \cdot dt / F$$

I = observed current during reaction (A); t = time of electrolysis (s); F = Faraday constant (96485 C/mol).

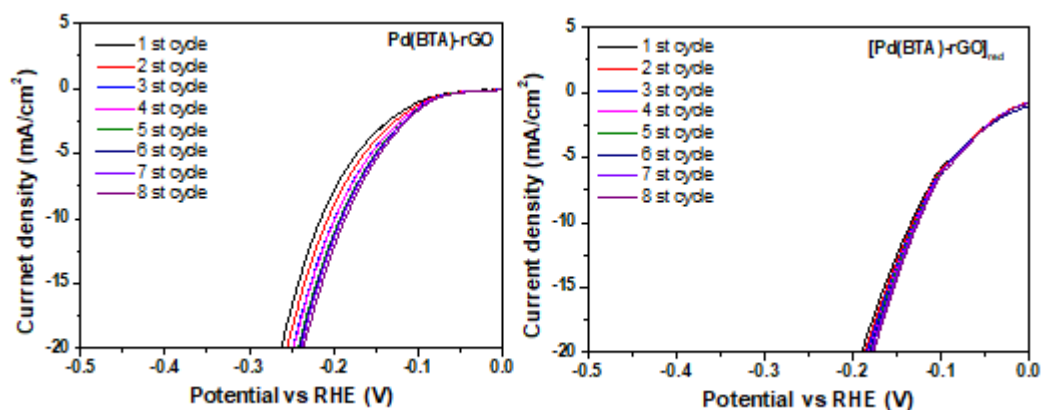

**Figure S12.** LSV of Pd(BTA)-rGO and [Pd(BTA)-rGO]<sub>red</sub> for different number of cycles.

**Table S2.** Values of various HER parameters from repetitive LSV cycles.

| No. of cycles        | Pd(BTA)-rGO          |                      |                                 | [Pd(BTA)-rGO] <sub>red</sub> |                      |                                 |
|----------------------|----------------------|----------------------|---------------------------------|------------------------------|----------------------|---------------------------------|
|                      | (-) $\eta_{10}$ (mV) | Tafel slope (mV/dec) | TOF (s <sup>-1</sup> ) @ -0.2 V | (-) $\eta_{10}$ (mV)         | Tafel slope (mV/dec) | TOF (s <sup>-1</sup> ) @ -0.2 V |
| 1.                   | 215                  | 76                   | 39.6                            | 133                          | 60                   | 53.1                            |
| 2.                   | 207                  | 73                   | 44.9                            | 131                          | 59                   | 55.2                            |
| 3.                   | 199                  | 70                   | 51.4                            | 129                          | 59                   | 56.7                            |
| 4.                   | 198                  | 69                   | 51.7                            | 128                          | 58                   | 58.5                            |
| 5.                   | 192                  | 67                   | 56.4                            | 128                          | 58                   | 58.5                            |
| 6.                   | 191                  | 66                   | 57.2                            | 127                          | 61                   | 58.8                            |
| 7.                   | 189                  | 65                   | 58.8                            | 126                          | 59                   | 60.5                            |
| 8.                   | 186                  | 64                   | 60.8                            | 125                          | 60                   | 62.3                            |
| <b>Average</b>       | <b>197.125</b>       | <b>68.750</b>        | <b>52.6</b>                     | <b>128.375</b>               | <b>59.25</b>         | <b>57.95</b>                    |
| <b>S<sup>2</sup></b> | <b>96.41</b>         | <b>17.071</b>        | <b>53.11</b>                    | <b>6.83</b>                  | <b>1.07</b>          | <b>8.47</b>                     |
| <b>S.D</b>           | <b>9.8</b>           | <b>4.1</b>           | <b>7.28</b>                     | <b>2.61</b>                  | <b>1.03</b>          | <b>2.91</b>                     |

S<sup>2</sup> = Sample variance.

S.D = Standard deviation.

Formula for calculation of standard deviation (SD):

$$S^2 = \sum (X_i - X_{\text{mean}})^2 / (n-1).$$

$$X_{\text{mean}} = \sum X_i / n.$$

$$S.D = \sqrt{\text{sample variance}}$$



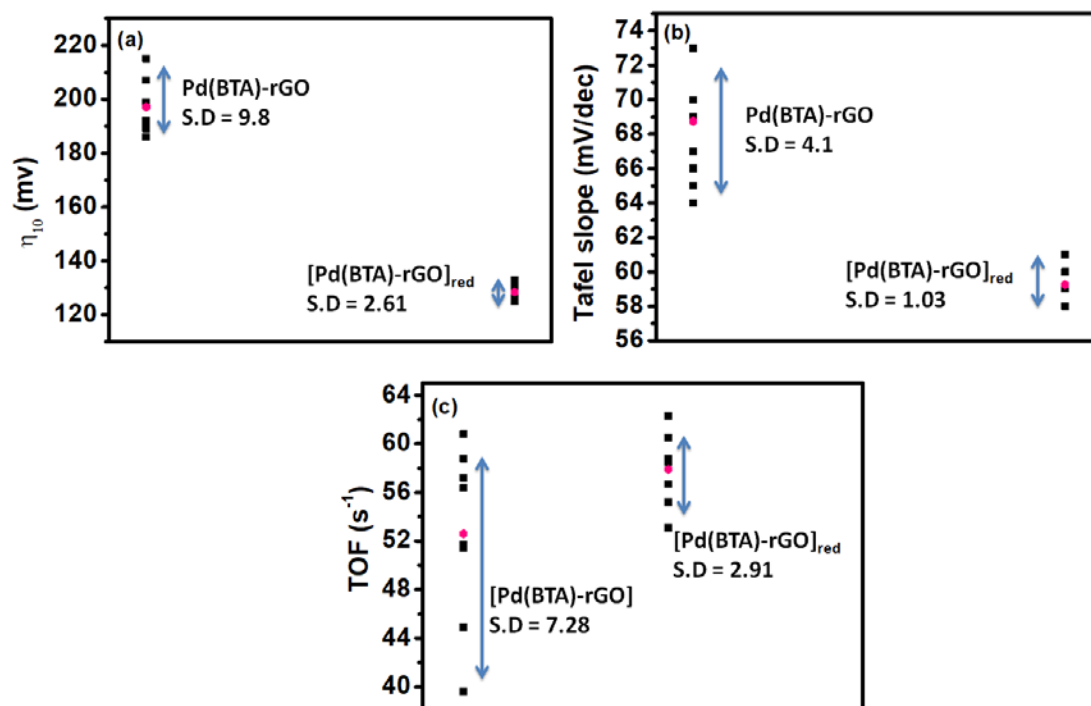

**Figure S13.** (a) (b) and (c) represent standard deviation plot of **Pd(BTA)-rGO** and **[Pd(BTA)-rGO]<sub>red</sub>** for various HER parameters.

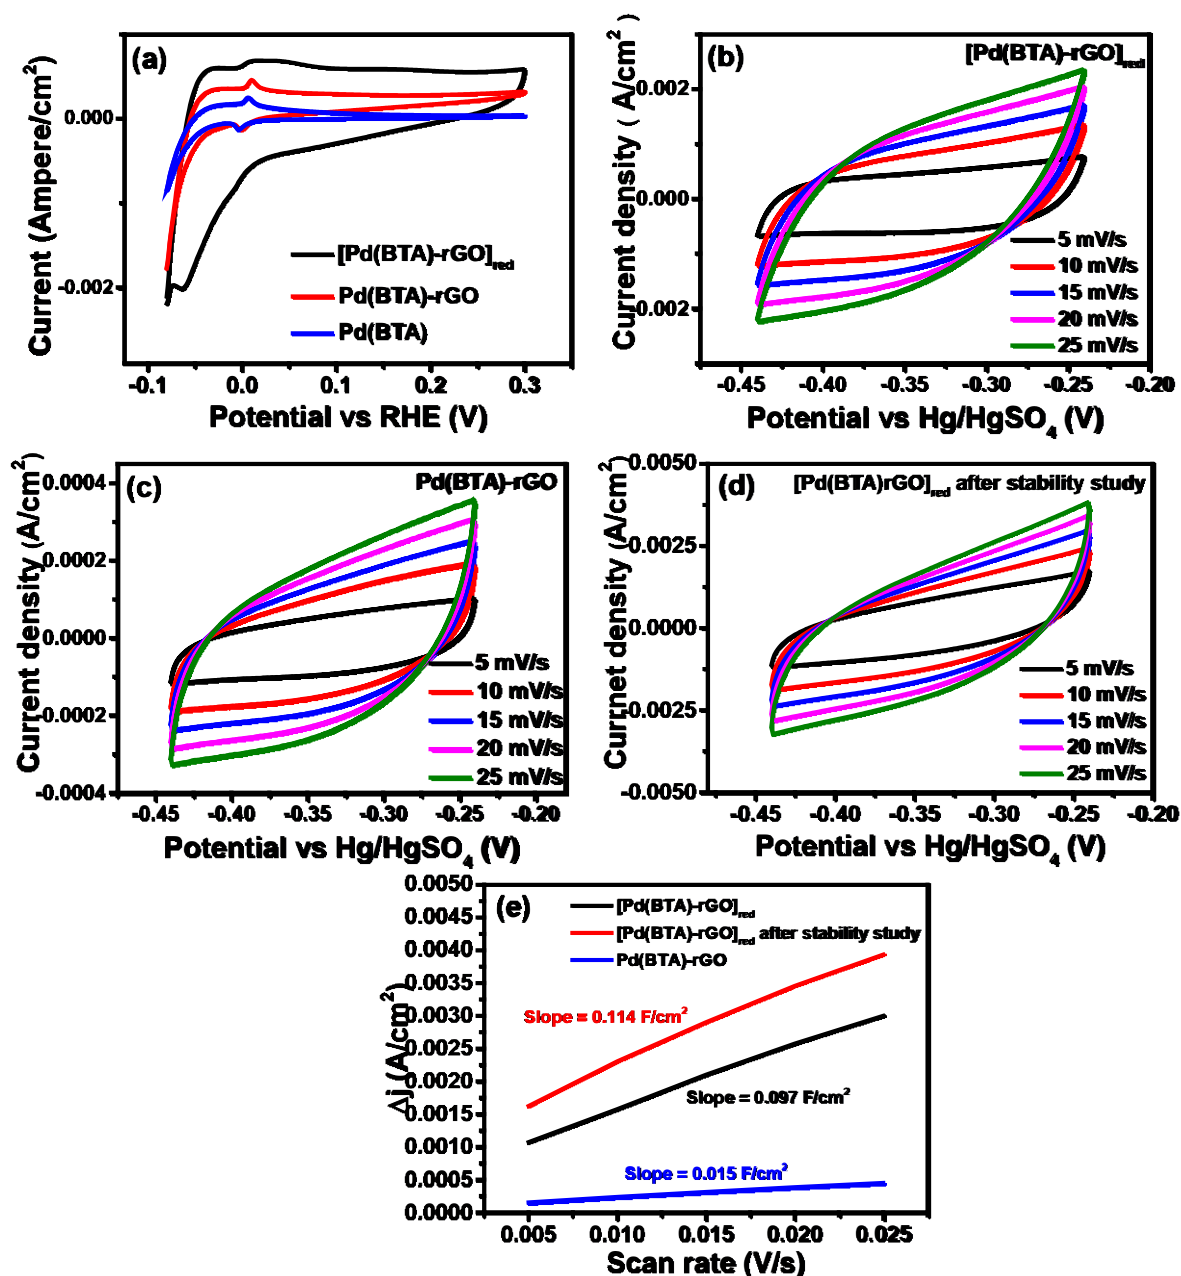

**Figure S14.** (a) Cyclic voltammograms recorded at a scan rate of 10 mV/s for the samples Pd(BTA) (blue-trace), Pd(BTA)-rGO (red-trace) and [Pd(BTA)-rGO]<sub>red</sub> (black-trace); (b) and (c) Cyclic voltammograms of [Pd(BTA)-rGO]<sub>red</sub> and Pd(BTA)-rGO at different scan rates (d) Cyclic voltammograms of [Pd(BTA)-rGO]<sub>red</sub> after stability test at different scan rates; (e) ECSA value of [Pd(BTA)-rGO]<sub>red</sub> (black trace), [Pd(BTA)-rGO]<sub>red</sub> after stability study (red trace), Pd(BTA)-rGO (blue-trace) obtained at -0.34 V.

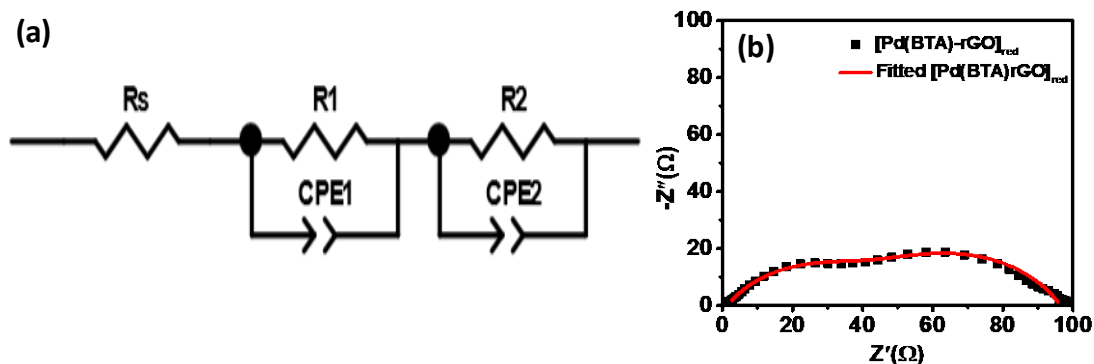

**Figure S15.** (a) Equivalent circuit model and (b) corresponding fitted diagram of the equivalent circuit for  $[\text{Pd}(\text{BTA})\text{-rGO}]_{\text{red}}$ .

**Table S3:** Fitted parameters of equivalent circuit model shown in Fig. S15a for  $[\text{Pd}(\text{BTA})\text{-rGO}]_{\text{red}}$

| $R_s$<br>( $\Omega$ ) | $R_1$<br>( $\Omega$ ) | $\text{CPE1-T}$<br>( $10^{-4}\text{F}$ ) | $\text{CPE1-P}$ | $R_2$<br>( $\Omega$ ) | $\text{CPE2-T}$ ( $10^{-5}\text{F}$ ) | $\text{CPE2-P}$ | $\chi^2$ ( $10^{-3}$ ) |
|-----------------------|-----------------------|------------------------------------------|-----------------|-----------------------|---------------------------------------|-----------------|------------------------|
| 1.52                  | 52.65                 | 2.7549                                   | 0.67            | 42.18                 | 3.2757                                | 0.64            | 1.25                   |

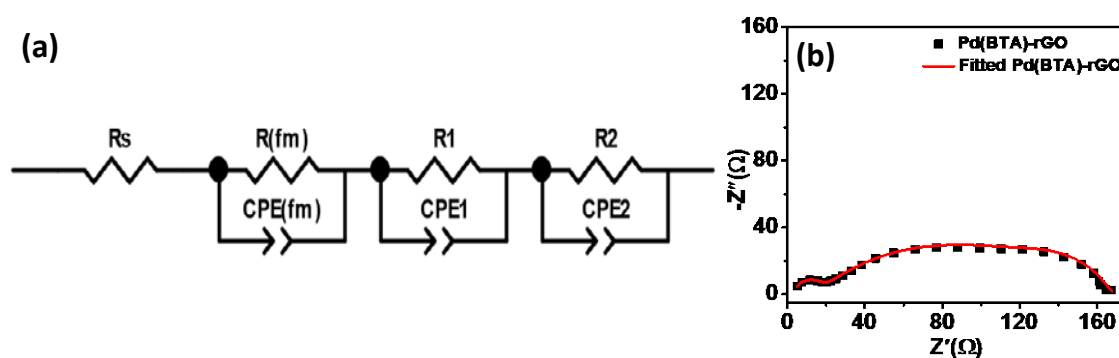

**Figure S16.** (a) Equivalent circuit model and (b) corresponding fitted diagram of equivalent circuit for  $\text{Pd}(\text{BTA})\text{-rGO}$

**Table S4:** Fitted parameters of Equivalent circuit model shown in Fig. S16a for  $\text{Pd}(\text{BTA})\text{-rGO}$

| $R_s$<br>( $\Omega$ ) | $R(\text{fm})$<br>( $\Omega$ ) | $\text{CPE}(\text{fm})\text{-T}$<br>( $10^{-8}\text{F}$ ) | $\text{CPE}(\text{fm})\text{-P}$ | $R_1$<br>( $\Omega$ ) | $\text{CPE1-T}$<br>( $10^{-4}\text{F}$ ) | $\text{CPE1-P}$ | $R_2$<br>( $\Omega$ ) | $\text{CPE2-T}$<br>( $10^{-4}\text{F}$ ) | $\text{CPE2-P}$ | $\chi^2$ ( $10^{-4}$ ) |
|-----------------------|--------------------------------|-----------------------------------------------------------|----------------------------------|-----------------------|------------------------------------------|-----------------|-----------------------|------------------------------------------|-----------------|------------------------|
| 2.94                  | 12.18                          | 3.0                                                       | 0.98                             | 26.1                  | 9.30                                     | 0.89            | 127                   | 1.76                                     | 0.52            | 6.27                   |

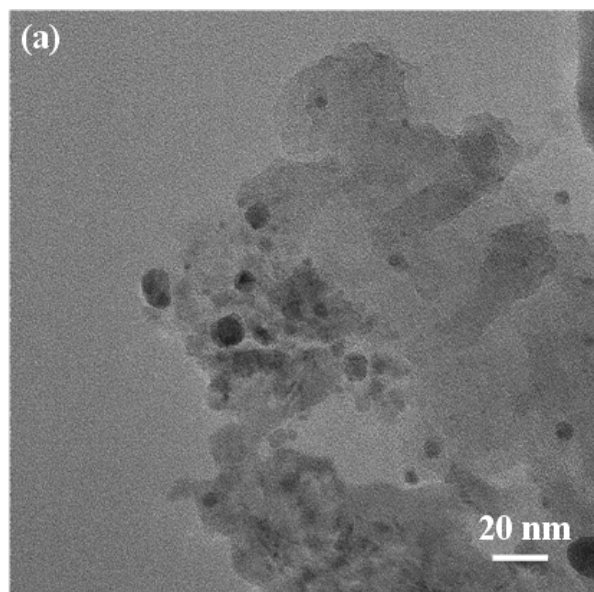

**Figure S17.** HRTEM image of  $[\text{Pd}(\text{BTA})\text{-rGO}]_{\text{red}}$  after 70 h of HER at a current density of  $-300 \text{ mA/cm}^2$ .

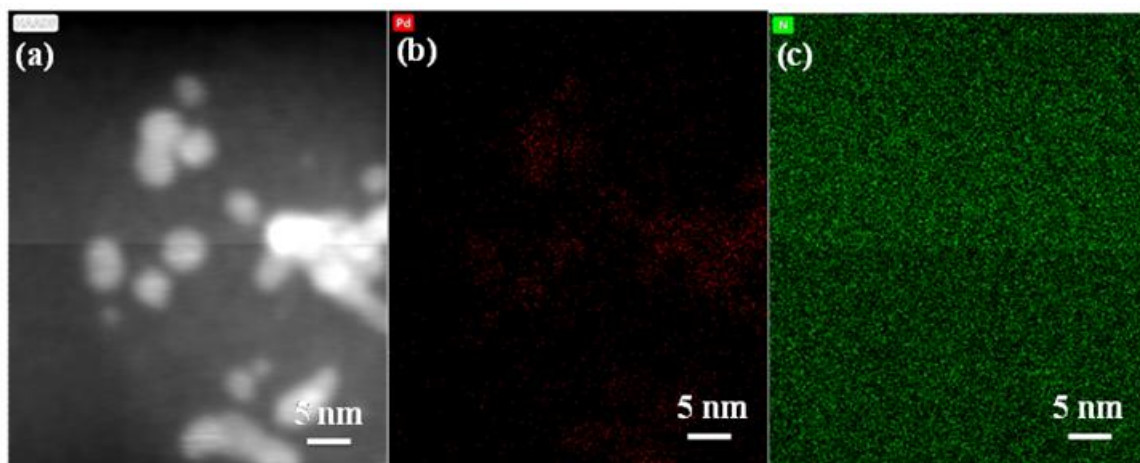

**Figure S18.** (a) HAADF image of  $[\text{Pd}(\text{BTA})\text{-rGO}]_{\text{red}}$  after cycling at  $-300 \text{ mA/cm}^2$  for 70 h; (b) & (c) TEM elemental mapping of Pd & Nitrogen..

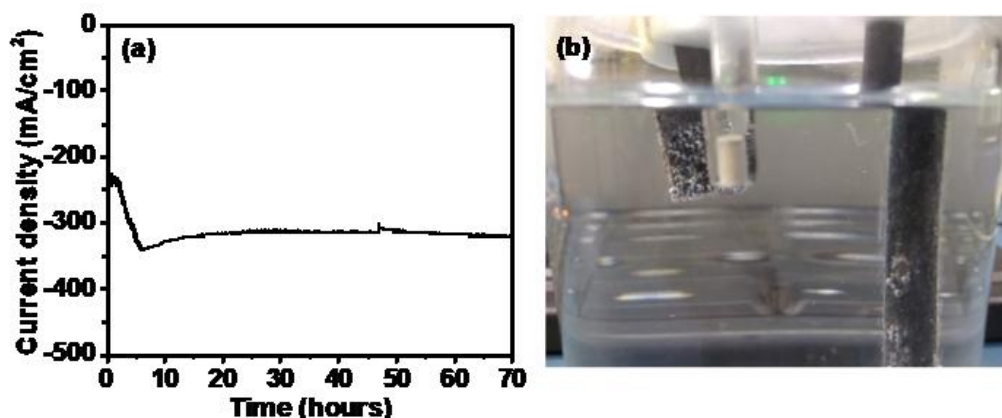

**Figure S19.** (a) Chronoamperometric curve of  $[\text{Pd}(\text{BTA})\text{-rGO}]_{\text{red}}$  using graphite as counter electrode; (b) photograph of cell set-up where the hydrogen evolution is apparent.

**Table S5.** Comparison of the over potential, Tafel slope and stability of the various Pd-based electrocatalysts reported so far with that of  $[\text{Pd}(\text{BTA})\text{-rGO}]_{\text{red}}$  realized in the present work.

| Sample                                | Over potential                            | Tafel slope (mV/dec) | Stability test <i>via</i> i-t curve. | Electrolyte                           | Ref |
|---------------------------------------|-------------------------------------------|----------------------|--------------------------------------|---------------------------------------|-----|
| (PdCo@CN)                             | -80 mV to attain -10 mA/cm <sup>2</sup>   | 31                   | ~40 mA/cm <sup>2</sup> for 11 h      | 0.5 M H <sub>2</sub> SO <sub>4</sub>  | 1   |
| Pd-CN <sub>x</sub>                    | -55 mV to attain -10 mA/cm <sup>2</sup>   | 35                   | -28 mA/ cm <sup>2</sup> for 100 h    | 0.5 M H <sub>2</sub> SO <sub>4</sub>  | 2   |
| Pd@Zr-AzoBDC MOF                      | -800 mV to attain -10 mA/cm <sup>2</sup>  | ---                  | ---                                  | 0.5 M Na <sub>2</sub> SO <sub>4</sub> | 3   |
| Pd graphene for HER                   | ----                                      | 46                   | -20 mA/cm <sup>2</sup> for 1500 s    | 0.5 M H <sub>2</sub> SO <sub>4</sub>  | 4   |
| Pd cube/PEIerGO <sub>50:1</sub>       | -100 mV to attain -108 mA/cm <sup>2</sup> | 34                   | -150 mA/cm <sup>2</sup> for 72 h     | 0.5 M H <sub>2</sub> SO <sub>4</sub>  | 5   |
| Pt@Pd NFs/rGO                         | -56 mV to attain -10 mA/cm <sup>2</sup>   | 39                   | -15 mA/cm <sup>2</sup> for 10000 s   | 0.5 M H <sub>2</sub> SO <sub>4</sub>  | 6   |
| Pd <sub>3.02</sub> Te NWs/rGO         | -97 mV to attain -10 mA/cm <sup>2</sup>   | 90                   | -32 mA/cm <sup>2</sup> for 48 h      | 0.5 M H <sub>2</sub> SO <sub>4</sub>  | 7   |
| PdCu@Pd Nanocube                      | -10 mV to attain -68 mA/cm <sup>2</sup>   | 35                   | -220 mA/cm <sup>2</sup> for 48 h     | 0.5 M H <sub>2</sub> SO <sub>4</sub>  | 8   |
| PdPS reduced graphene oxide composite | -90 mV to attain -10 mA/cm <sup>2</sup>   | 46                   | ----                                 | 0.5 M H <sub>2</sub> SO <sub>4</sub>  | 9   |
| Pd nanoparticle assembly              | -80 mV to attain -100 mA/cm <sup>2</sup>  | 30                   | -10 mA/cm <sup>2</sup> for 25000 s   | 0.5 M H <sub>2</sub> SO <sub>4</sub>  | 10  |
| Pd@MOF-74-Co-3                        | -106 mV to attain -10 mA/cm <sup>2</sup>  | 57                   | -----                                | 0.5 M H <sub>2</sub> SO <sub>4</sub>  | 11  |
| Co@Pd core-shell particles            | -145 mV to attain -10 mA/cm <sup>2</sup>  | 55.7                 | -10 mA/cm <sup>2</sup> for 10 h      | 0.5 M H <sub>2</sub> SO <sub>4</sub>  | 12  |
| monoclinic Pd rich PdBi <sub>2</sub>  | -140 mV to attain -20 mA/cm <sup>2</sup>  | 63                   | -----                                | 0.5 M HClO <sub>4</sub>               | 13  |
| Pd <sub>2</sub> Si                    | -192 mV to attain -10 mA/cm <sup>2</sup>  | 131                  | -----                                | 0.5 M H <sub>2</sub> SO <sub>4</sub>  | 14  |

|                                                           |                                          |     |                                      |                                      |           |
|-----------------------------------------------------------|------------------------------------------|-----|--------------------------------------|--------------------------------------|-----------|
| Copper benzenehexathiol coordinated polymer Cu[BHT]       | -450 mV to attain -10 mA/cm <sup>2</sup> | 95  | -261 mA/cm <sup>2</sup> for 20 hours | 0.5 M H <sub>2</sub> SO <sub>4</sub> | 15        |
| 1D helical coordination polymer Zn <sup>2+</sup> ( fcdHp) | -340 mV to attain -10 mA/cm <sup>2</sup> | 110 |                                      | 0.5 M H <sub>2</sub> SO <sub>4</sub> | 16        |
| 1D helical coordination polymer Co <sup>2+</sup> ( fcdHp) | -450 mV to attain -10 mA/cm <sup>2</sup> | 120 |                                      | 0.5 M H <sub>2</sub> SO <sub>4</sub> | 16        |
| [Pd(BTA)-rGO] <sub>red</sub>                              | -127 mV to attain -10 mA/cm <sup>2</sup> | 55  | -300 mA/cm <sup>2</sup> for 70 h     | 0.5 M H <sub>2</sub> SO <sub>4</sub> | This work |

It is immediately apparent that [Pd(BTA)-rGO]<sub>red</sub> exhibits a remarkable over potential of -127 mV at -10 mA/cm<sup>2</sup> current density featuring a Tafel slope of 55 mV/dec with high durability of 70 hours at -300 mA/cm<sup>2</sup>.

## References

- Chen, J.; Xia, G.; Jiang, P.; Yang, Y.; Li, R.; Shi, R.; Su, J.; Chen, Q., Active and Durable Hydrogen Evolution Reaction Catalyst Derived from Pd-Doped Metal–Organic Frameworks. *ACS Appl. Mater. Interfaces* **2016**, 8 (21), 13378-13383.
- Bhowmik, T.; Kundu, M. K.; Barman, S., Palladium nanoparticle–graphitic carbon nitride porous synergistic catalyst for hydrogen evolution/oxidation reactions over a broad range of pH and correlation of its catalytic activity with measured hydrogen binding energy. *ACS Catal.* **2016**, 6 (3), 1929-1941.
- Le, H. V.; Nguyen, Q. T. T.; Nguyen, P. K. T.; Nguyen, H. T., A Composite Based on Pd Nanoparticles Incorporated into a Zirconium-Based Metal–Organic Frameworks Zr–AzoBDC and Its Electrocatalytic Activity for Hydrogen Evolution Reaction. *J. Electron. Mater.* **2018**, 47 (11), 6918-6922.
- Ghasemi, S.; Hosseini, S. R.; Nabipour, S.; Asen, P., Palladium nanoparticles supported on graphene as an efficient electrocatalyst for hydrogen evolution reaction. *Int. J. Hydrogen Energy* **2015**, 40 (46), 16184-16191.
- Li, J.; Zhou, P.; Li, F.; Ma, J.; Liu, Y.; Zhang, X.; Huo, H.; Jin, J.; Ma, J., Shape-controlled synthesis of Pd polyhedron supported on polyethyleneimine-reduced graphene oxide for enhancing the efficiency of hydrogen evolution reaction. *J. Power Sources* **2016**, 302, 343-351.
- Lin, X.-X.; Wang, A.-J.; Fang, K.-M.; Yuan, J.; Feng, J.-J., One-pot seedless aqueous synthesis of reduced graphene oxide (rGO)-supported core–shell Pt@ Pd nanoflowers as advanced catalysts for oxygen reduction and hydrogen evolution. *ACS Sustainable Chem. Eng.* **2017**, 5 (10), 8675-8683.

7. Jiao, L.; Li, F.; Li, X.; Ren, R.; Li, J.; Zhou, X.; Jin, J.; Li, R., Ultrathin PdTe nanowires anchoring reduced graphene oxide cathodes for efficient hydrogen evolution reaction. *Nanoscale* **2015**, 7 (44), 18441-18445.
8. Li, J.; Li, F.; Guo, S.-X.; Zhang, J.; Ma, J., PdCu@ Pd nanocube with Pt-like activity for hydrogen evolution reaction. *ACS Appl. Mater. Interfaces* **2017**, 9 (9), 8151-8160.
9. Sarkar, S.; Sampath, S., Equiatomic ternary chalcogenide: PdPS and its reduced graphene oxide composite for efficient electrocatalytic hydrogen evolution. *Chem. Commun.* **2014**, 50 (55), 7359-7362.
10. Liu, S.; Mu, X.; Duan, H.; Chen, C.; Zhang, H., Pd nanoparticle assemblies as efficient catalysts for the hydrogen evolution and oxygen reduction reactions. *Eur. J. Inorg. Chem.* **2017**, 2017 (3), 535-539.
11. Zheng, F.; Zhang, C.; Gao, X.; Du, C.; Zhuang, Z.; Chen, W., Immobilizing Pd nanoclusters into electronically conductive metal-organic frameworks as Bi-functional electrocatalysts for hydrogen evolution and oxygen reduction reactions. *Electrochim. Acta* **2019**.
12. Yang, H.; Tang, Z.; Wang, K.; Wu, W.; Chen, Y.; Ding, Z.; Liu, Z.; Chen, S., Co@ Pd core-shell nanoparticles embedded in nitrogen-doped porous carbon as dual functional electrocatalysts for both oxygen reduction and hydrogen evolution reactions. *J. Colloid Interface Sci.* **2018**, 528, 18-26.
13. Sarkar, S.; Subbarao, U.; Peter, S. C., Evolution of dealloyed PdBi<sub>2</sub> nanoparticles as electrocatalysts with enhanced activity and remarkable durability in hydrogen evolution reactions. *J. Mater. Chem. A* **2017**, 5 (30), 15950-15960.
14. McEnaney, J. M.; Schaak, R. E., Solution synthesis of metal silicide nanoparticles. *Inorg. Chem.* **2014**, 54 (3), 707-709.
15. Huang, X.; Yao, H.; Cui, Y.; Hao, W.; Zhu, J.; Xu, W.; Zhu, D., Conductive copper benzenehexathiol coordination polymer as a hydrogen evolution catalyst. *ACS Appl. Mater. Interfaces* **2017**, 9 (46), 40752-40759.
16. Shekurov, R.; Khrizanforova, V.; Gilmanova, L.; Khrizanforov, M.; Miluykov, V.; Kataeva, O.; Yamaleeva, Z.; Burganov, T.; Gerasimova, T.; Khamatgalimov, A., Zn and Co redox active coordination polymers as efficient electrocatalysts. *Dalton Trans.* **2019**, 48 (11), 3601-3609.
